# Supplementary material for: Metabolomic study of corticosterone-induced cytotoxicity in PC12 cells by ultra performance liquid chromatography-quadrupole/time-of-flight mass spectrometry
Source: Royal Society of Chemistry journal article supplement (doi:10.1039/c5mb00642b), 2016-01-07
Supplement: c5mb00642b1.xlsx [file c5mb00642b1.xlsx]

## Sheet: Sheet1
Primary ID	31.19_1144.3433	32.42_1144.3393	30.13_1144.3385	30.95_1144.3364	29.73_1144.3352	30.49_1144.3338	32.14_1144.3381	0.59_1144.2667	29.73_1143.7631	32.97_1143.6786	14.43_1143.6179	32.94_1143.5227	30.88_1143.3634	0.56_1142.7668	32.95_1142.6487	32.96_1142.5922	31.34_932.6882	29.94_932.6805	0.63_932.4977	33.07_932.4896	0.58_932.4159	30.88_931.6876	28.74_931.6065	29.85_931.5827	33.09_931.5313	30.84_931.2136	29.58_931.2066	0.56_930.6833	29.87_930.5905	15.03_930.5834	25.75_930.5742	14.06_930.5712	32.96_777.5342	12.16_777.4068	30.39_777.2228	0.76_777.0790	0.55_776.8097	32.96_776.7972	32.95_776.7251	0.58_776.5753	33.30_776.5749	25.44_776.5703	33.95_776.5582	33.02_776.5570	0.59_776.4798	32.32_776.2383	32.19_776.2304	31.57_776.2204	25.82_644.5093
+KY-2015-357	0.0395228	-0.0510178	-0.0649869	-0.0602953	-0.0339462	-0.0677	-0.0581819	0.294388	0.1711	0.0455994	0.0819608	-0.0196702	-0.0320374	-0.269612	-0.170013	-0.151219	0.36075	-0.0374988	0.266234	0.165396	0.642088	0.000977083	-0.0369621	0.129608	-0.0519786	-0.212232	-0.0358521	0.513171	-0.0445538	-0.39705	0.00167793	-0.0382332	-0.0999721	-0.0401838	0.243961	0.0633257	0.519301	-0.248717	-0.0770527	0.286461	-0.0356065	-0.0564472	-0.0229178	-0.0698391	0.243041	0.125271	2.22163	-0.320493	0.156885
+KY-2015-358	0.083456	-0.0510178	-0.00347754	-0.0602953	-0.0339462	0.0534795	-0.0581819	0.0991723	-0.172302	-0.0752919	-0.0804635	-0.0212989	-0.0320374	-0.265873	-0.0112809	0.00862554	-0.274417	-0.0374988	-0.0555731	-0.0356848	0.397374	-0.00724513	-0.0369621	-0.0410878	-0.0519786	-0.212232	-0.0358521	0.477564	0.114841	-0.439075	-0.0297995	-0.0382332	0.579247	0.0486976	-0.017565	0.127982	0.878308	-0.171668	-0.00386945	0.288869	-0.0356065	-0.193926	-0.0229178	0.0763821	-0.138578	-0.0519681	-1.36691	-0.320493	-0.0425648
+KY-2015-359	0.0660668	-0.0510178	0.0575966	0.00213214	-0.0339462	-0.0677	-0.0581819	0.0321741	-0.131591	-0.0752919	0.00306767	0.0439598	-0.0320374	-0.262971	-0.0849359	-0.0463924	-0.235106	-0.0374988	0.0651873	0.0843976	0.519434	-0.147767	-0.0369621	-0.0410878	-0.0519786	-0.212232	0.132437	0.445849	-0.0445538	0.168652	-0.0506586	-0.0382332	0.0675575	0.152168	-0.0794532	0.269204	0.258255	-0.162215	0.0470527	0.373848	-0.0356065	0.474652	-0.0229178	0.0279928	0.284559	-0.0519681	6.70509	2.53242	-0.0425648
+KY-2015-360	-0.0862719	-0.0510178	-0.0649869	0.155369	0.105066	0.0769754	0.206025	-0.0992448	-0.136452	-0.0752919	-0.0804635	-0.093127	-0.0320374	0.991489	0.0314185	0.228275	-0.349628	-0.0374988	-0.0555731	-0.0356848	-0.300218	0.390448	0.0709549	-0.0410878	0.201509	-0.212232	0.118528	-0.316709	-0.0445538	0.178937	-0.0506586	-0.0382332	-0.0999721	-0.0401838	-0.0794532	-0.0828733	0.309614	-0.146505	0.0547639	-0.256347	0.160235	0.00783858	0.135997	-0.119653	-0.138578	-0.0519681	-0.361805	-0.320493	-0.0425648
+KY-2015-361	0.0761745	0.0720216	-0.0649869	0.156425	0.132557	0.0465613	-0.0581819	-0.0992448	-0.0225586	-0.0752919	-0.0804635	-0.0221936	-0.0320374	0.802933	-0.0999605	-0.00701327	0.0375491	0.13717	-0.0555731	-0.0356848	-0.300218	0.110421	-0.0369621	-0.0410878	-0.0519786	0.658063	-0.0358521	-0.316709	-0.0445538	0.521596	0.0909181	0.124922	-0.0999721	-0.0401838	0.17916	-0.0769496	0.335098	0.503313	0.0276119	0.207729	0.0890104	0.0467087	-0.0229178	0.563727	-0.138578	-0.0519681	-0.140153	-0.320493	-0.0425648
+KY-2015-362	-0.0862719	0.0493441	0.163927	-0.0602953	-0.0339462	0.161484	-0.0581819	-0.0992448	0.251154	0.065468	0.0409332	0.186789	-0.0320374	-0.187131	0.0496266	0.0349273	0.0408893	-0.0374988	-0.0555731	-0.0356848	-0.300218	-0.147767	-0.0369621	0.137404	-0.0519786	0.358143	-0.0358521	-0.316709	0.197036	-0.02285	0.0309961	-0.0382332	-0.0999721	-0.0401838	-0.0794532	-0.0958751	-0.84375	0.130439	-0.160935	-0.256347	-0.0356065	0.0204462	-0.0229178	-0.119653	-0.138578	0.238506	-0.984284	-0.288966	-0.0425648
+KY-2015-363	-0.0862719	-0.0510178	0.106889	-0.0602953	-0.0339462	-0.0677	0.091259	-0.0992448	-0.1065	-0.0752919	0.129374	-0.093127	0.0967338	-0.269612	0.416434	0.10772	0.237544	0.125322	-0.0555731	-0.0356848	-0.300218	-0.147767	0.144528	-0.0410878	-0.0519786	-0.0204385	-0.0358521	-0.316709	-0.0445538	0.199181	-0.0506586	0.00921137	-0.0999721	-0.0401838	-0.0794532	-0.0958751	-0.873752	0.388098	-0.160935	-0.256347	-0.0356065	0.0204794	-0.0229178	-0.119653	-0.138578	-0.0519681	-0.957542	-0.320493	0.141069
+KY-2015-364	0.0798678	0.184741	-0.0649869	-0.0602953	-0.0339462	-0.0677	0.0231756	-0.0992448	0.305815	0.181981	-0.0804635	0.0260013	0.127528	-0.269612	-0.047263	-0.151219	0.485229	-0.0374988	-0.0555731	-0.0356848	-0.300218	0.0964661	-0.0369621	-0.0410878	0.162341	0.0653923	-0.0358521	-0.316709	-0.0445538	0.151466	0.108842	-0.0382332	-0.0999721	-0.0401838	-0.0794532	-0.0958751	-0.634566	-0.0592599	0.36575	-0.256347	-0.0356065	-0.0289174	-0.0229178	-0.119653	-0.138578	-0.0519681	-2.35941	-0.320493	-0.0425648
+KY-2015-365	-0.0862719	-0.0510178	-0.0649869	-0.0124487	-0.0339462	-0.0677	-0.0295499	0.0704903	-0.158665	0.0834108	0.0665182	-0.00733286	-0.0320374	-0.269612	-0.0840259	-0.023704	-0.302812	-0.0374988	0.00201774	-0.0356848	-0.0578062	-0.147767	0.00628966	-0.0204859	-0.0519786	-0.212232	-0.0358521	0.146962	-0.0445538	-0.360858	-0.0506586	0.0952658	-0.0469714	0.0402365	-0.00828982	-0.0130632	0.05149	-0.233485	-0.0923865	-0.131519	-0.0356065	-0.290834	0.0244277	-0.119653	0.303868	-0.0519681	-2.75662	-0.320493	-0.0425648
[truncated: 5,000 more columns]
