# Supplementary material for: Metabolomic study of corticosterone-induced cytotoxicity in PC12 cells by ultra performance liquid chromatography-quadrupole/time-of-flight mass spectrometry
Source: Royal Society of Chemistry journal article supplement (doi:10.1039/c5mb00642b), 2016-01-07
Supplement: c5mb00642b2.xlsx [file c5mb00642b2.xlsx]

## Sheet: Sheet1
Primary ID	0.55_968.7875	32.96_968.7113	32.94_968.6737	32.92_968.5772	32.98_968.5088	0.58_968.4685	29.73_968.4367	33.01_968.3767	0.59_968.3039	30.96_968.2300	30.88_968.2256	32.95_967.7061	32.94_967.6265	33.02_967.4099	29.82_967.0371	30.08_967.0330	0.57_733.8296	32.89_733.6928	0.64_733.6333	0.55_733.3633	25.22_733.0905	29.81_733.0679	31.78_733.0561	31.93_733.0535	25.38_733.0427	29.34_733.0379	31.32_733.0323	29.72_733.0257	31.15_733.0186	0.55_732.8589	32.95_732.8154	32.94_732.7353	31.04_541.0200	30.84_541.0197	31.25_541.0114	25.57_541.0113	30.54_541.0109	31.46_541.0087	31.35_541.0064	29.59_540.9936	0.56_540.8449	33.15_540.7986	0.74_540.6757	0.58_540.6708	33.10_540.6381	29.85_540.3893	30.45_540.0229	31.53_540.0227	34.04_305.8598
-KY-2015-357	0.890975	-0.825091	-0.97947	-0.78152	0.481098	-0.909152	-0.500431	-0.589126	0.410429	-0.43892	0.730076	-0.995945	-0.626538	-0.114063	-0.560011	0.471516	-0.587503	0.414102	1.06111	-0.536601	-0.291143	-0.621924	2.09245	1.80243	-0.606612	-0.448235	0.874015	0.781581	1.12557	-0.850216	-0.560869	-1.00915	-0.492808	-0.475256	-0.732209	-0.830179	-0.578732	0.728299	-0.602406	1.4922	0.282525	-0.736014	-0.464231	0.209268	1.42999	0.0705717	-0.708807	-0.503907	-0.570232
-KY-2015-358	0.935837	-0.825091	0.794087	0.067821	0.294546	1.07013	-0.500431	-0.589126	-0.555852	0.553494	-0.800556	-0.297289	-0.626538	-0.063555	0.314323	-0.762683	-0.587503	-0.489549	-0.538024	-0.513189	-0.436366	-0.621924	1.37858	1.72457	0.605362	0.654714	0.0720459	-0.459063	-0.640608	-0.891775	-0.0293082	0.0203639	-0.492808	-0.475256	-0.732209	-1.0593	-0.578732	-0.646302	1.3502	1.88615	0.614125	-0.736014	2.40308	-0.247088	0.216991	-1.02645	-0.708807	1.79059	1.57652
-KY-2015-359	1.80192	0.646226	0.136809	0.248534	-0.721596	1.70615	1.51549	-0.589126	-0.555852	-0.43892	1.1083	-0.995945	-0.626538	-0.746461	-0.560011	-0.0236708	-0.587503	-0.00476179	-0.538024	-0.378363	0.245173	-0.621924	-0.495862	-0.503857	-0.606612	-0.448235	0.424976	-0.459063	-0.036569	-0.648359	-0.0648603	-1.10677	1.30654	-0.475256	0.911577	-0.239458	-0.578732	-0.646302	0.284699	-0.600672	0.999718	-0.309119	-0.464231	2.02746	1.23377	-0.505341	0.055632	-0.503907	-0.570232
-KY-2015-360	-0.648674	-0.825091	-0.97947	1.92068	-0.721596	-0.909152	-0.500431	-0.310898	-0.555852	-0.43892	1.67037	0.560377	0.464252	-0.746461	2.35391	0.812501	0.805685	-0.489549	-0.538024	-0.201569	-0.765864	2.03488	-0.495862	-0.503857	-0.606612	-0.448235	0.064893	-0.459063	-0.640608	1.33152	0.837216	-0.14543	-0.492808	-0.475256	-0.732209	-0.844337	-0.578732	-0.646302	1.97953	-0.600672	-0.951754	-0.496973	-0.464231	-0.769403	-1.24943	-1.02645	0.600772	1.73676	-0.570232
-KY-2015-361	-0.828655	1.44852	-0.97947	1.28307	-0.721596	0.0335296	1.98753	1.48446	-0.555852	-0.43892	-0.800556	-0.995945	1.62813	2.31693	-0.560011	-0.367241	2.36558	-0.489549	-0.538024	0.996666	-0.765864	-0.621924	-0.495862	-0.503857	-0.606612	-0.448235	1.96625	2.43186	2.16275	1.24387	-1.46854	0.538911	2.14311	-0.475256	-0.732209	0.361739	-0.578732	-0.646302	-0.602406	-0.600672	-0.951754	0.329913	-0.464231	-0.769403	0.619513	0.792251	0.752901	-0.503907	-0.570232
-KY-2015-362	-0.86195	-0.825091	0.781076	-0.78152	-0.721596	-0.54902	-0.500431	-0.589126	-0.555852	-0.43892	-0.800556	0.234147	-0.626538	-0.746461	0.691832	-0.762683	-0.146938	-0.489549	-0.538024	-0.711527	0.202575	-0.621924	-0.495862	-0.503857	0.876002	-0.448235	-0.387206	-0.459063	-0.640608	0.98654	-0.687984	1.53833	-0.492808	2.32866	1.94378	0.292242	1.62375	1.61741	-0.602406	-0.600672	-0.951754	-0.497667	-0.464231	-0.762197	-0.272616	0.224135	-0.708807	-0.503907	-0.570232
-KY-2015-363	-0.880632	-0.825091	0.618093	-0.78152	2.14665	-0.909152	-0.500431	1.98017	-0.555852	2.51895	-0.800556	2.06872	-0.626538	0.30564	-0.560011	2.15763	-0.587503	2.52795	-0.538024	2.29254	0.161145	-0.621924	-0.495862	-0.503857	2.15831	2.48293	-1.00499	-0.459063	-0.640608	0.54336	-0.608316	1.48487	-0.492808	-0.475256	-0.732209	2.0271	-0.578732	1.5321	-0.602406	-0.600672	-0.951754	2.47775	-0.464231	-0.769403	-1.24943	1.99212	2.13473	-0.503907	-0.570232
-KY-2015-364	-0.636837	1.11132	1.58781	-0.78152	-0.721596	-0.492187	-0.500431	-0.2081	0.540159	-0.43892	-0.800556	0.525943	1.66685	-0.746461	-0.560011	-0.762683	-0.587503	-0.489549	2.26445	-0.300434	2.41621	1.07103	-0.495862	-0.503857	-0.606612	-0.448235	-1.00499	-0.459063	-0.640608	-0.823159	1.85894	-0.678927	-0.492808	-0.475256	0.841901	0.870789	1.83127	-0.646302	-0.602406	-0.600672	1.69525	0.181256	-0.464231	1.18985	0.155237	0.391651	-0.708807	-0.503907	1.88727
-KY-2015-365	0.228018	0.919388	-0.97947	-0.394026	0.685681	0.958848	-0.500431	-0.589126	2.38452	-0.43892	0.494035	-0.104064	-0.626538	0.540894	-0.560011	-0.762683	-0.0868095	-0.489549	-0.0974162	-0.647525	-0.765864	0.625633	-0.495862	-0.503857	-0.606612	-0.448235	-1.00499	-0.459063	-0.048712	-0.891775	0.72372	-0.642196	-0.492808	0.99813	-0.0362081	-0.578594	0.0173727	-0.646302	-0.602406	0.225684	0.215401	-0.213129	0.846537	-0.109093	-0.884033	-0.912494	-0.708807	-0.503907	-0.0424033
[truncated: 5,000 more columns]
