# Supplementary material for: Metabolomic study of corticosterone-induced cytotoxicity in PC12 cells by ultra performance liquid chromatography-quadrupole/time-of-flight mass spectrometry
Source: Royal Society of Chemistry journal article supplement (doi:10.1039/c5mb00642b), 2016-01-07

**Figure S1.** PCA scores plot based on the data from UPLC–MS profiling data in (A) positive and (B) negative ion mode ( $n = 3$ ). Legend: black, controls; blue, 50 $\mu\text{M/L}$  corticosterone group; red, 200 $\mu\text{M/L}$  corticosterone group.

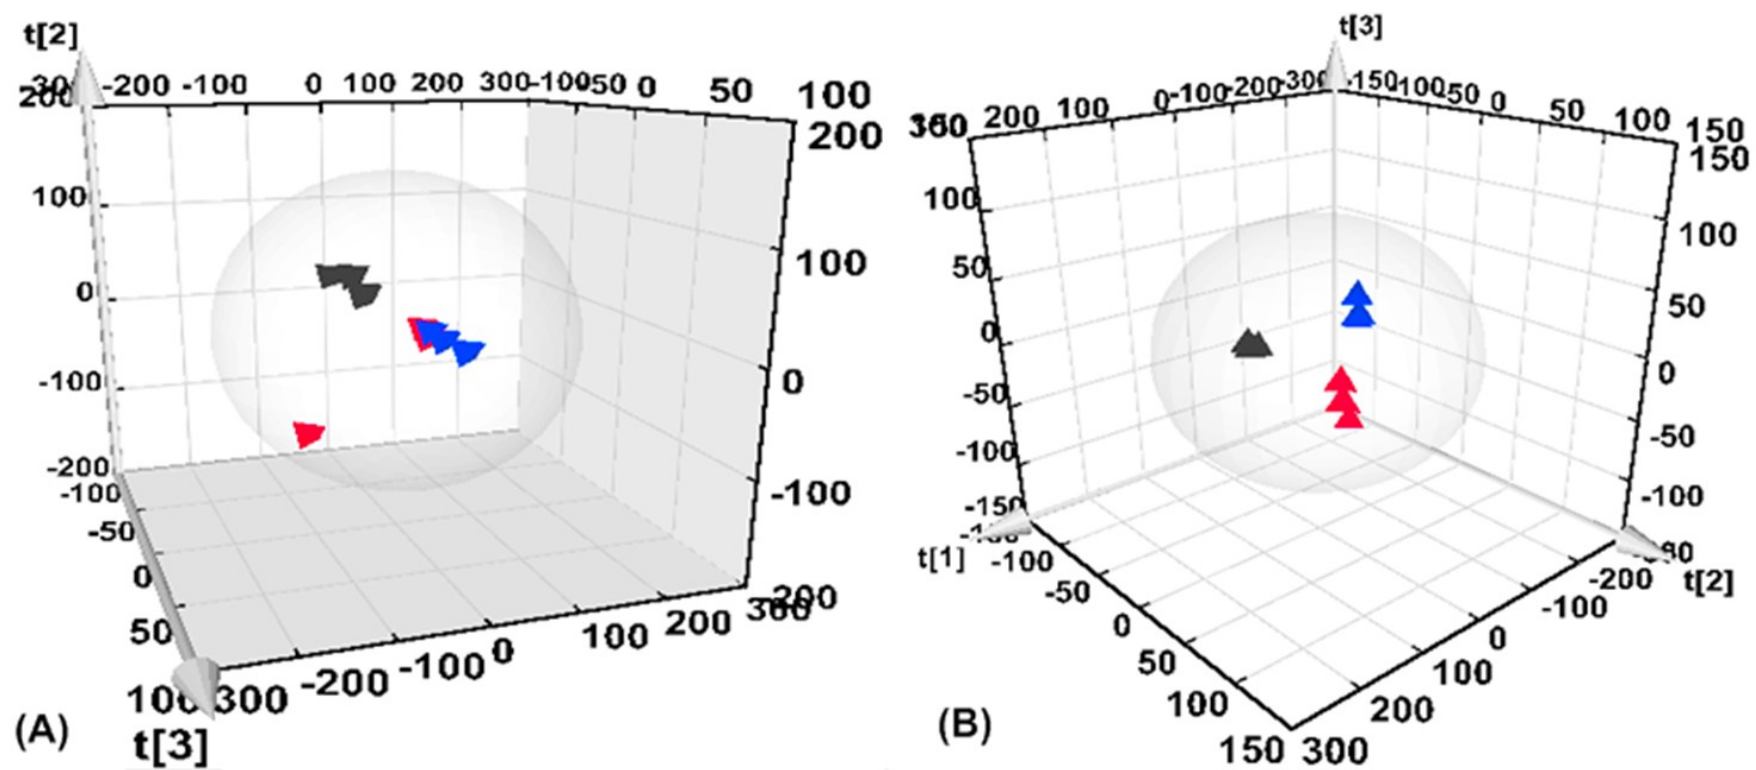

**Figure S2.** Variation of total twenty-eight variables among control group and corticosterone-treated groups with different concentration in PC12 cells (n = 3).

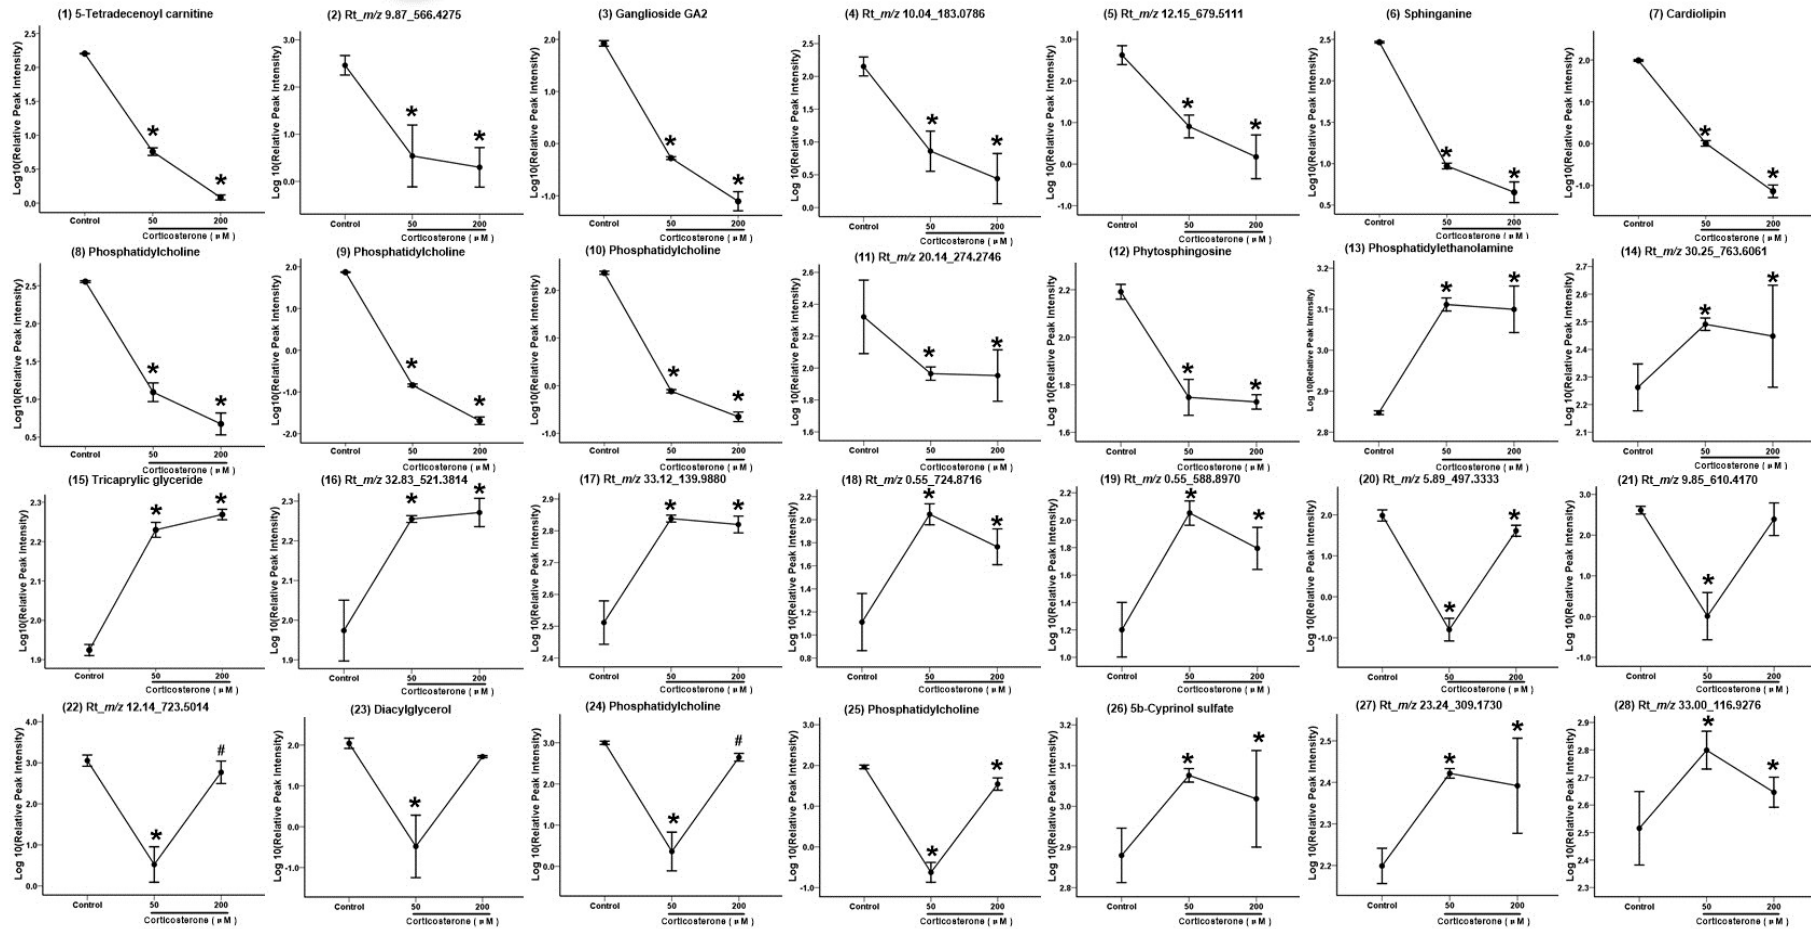

Supplement: c5mb00642b3.pdf [file c5mb00642b3.pdf]
